# Supplementary material for: Factors encouraging mobile instant messaging service use in medical education
Source: PeerJ. 2019 Jul 8;7:e7275. doi: 10.7717/peerj.7275 (PMC6622154; doi:10.7717/peerj.7275)
Supplement: Dataset S1 — *A one-week rotation; Monday through Friday [file peerj-07-7275-s001.xlsx]

## Sheet: Dataset_1
Clinical education group	First day of clinical education period	Clinical education period	Members who were invited to chat room on Kakao Talk		Total number of chats	Number of academic chats
	(YYMMDD)	(1st - 5th day)	No	Student, Teacher, and Hospital resident
		(Monday through Friday)
1	141114	1st	1	Student 1	1	0
		1st	2	Student 2	1	0
		1st	3	Student 3	1	0
		1st	4	Student 4	1	0
		1st	5	Student 5	1	0
		1st	6	Teacher 1	0	0
		1st	7	Teacher 2	1	0
		1st	8	Teacher 3	0	0
		1st	9	Teacher 4	0	0
		1st	10	Hospital resident	2	0
		3rd	1	Student 1	2	2
		3rd	2	Student 2	1	0
		3rd	3	Student 3	1	0
		3rd	4	Student 4	1	0
		3rd	5	Student 5	0	0
		3rd	6	Teacher 1	5	3
		3rd	7	Teacher 2	1	1
		3rd	8	Teacher 3	0	0
		3rd	9	Teacher 4	0	0
		4th	1	Student 1	0	0
		4th	2	Student 2	5	5
		4th	3	Student 3	0	0
		4th	4	Student 4	0	0
		4th	5	Student 5	0	0
		4th	6	Teacher 1	1	1
		4th	7	Teacher 2	7	7
		4th	8	Teacher 3	0	0
		4th	9	Teacher 4	0	0
		5th	1	Student 1	1	0
		5th	2	Student 2	0	0
		5th	3	Student 3	1	0
		5th	4	Student 4	0	0
		5th	5	Student 5	1	0
		5th	6	Teacher 1	1	0
		5th	7	Teacher 2	0	0
		5th	8	Teacher 3	0	0
		5th	9	Teacher 4	0	0
2	141122	1st	1	Student 1	1	0
		1st	2	Student 2	1	0
		1st	3	Student 3	0	0
		1st	4	Student 4	0	0
		1st	5	Student 5	0	0
		1st	6	Teacher 1	0	0
		1st	7	Teacher 2	0	0
		1st	8	Teacher 3	0	0
		1st	9	Teacher 4	0	0
		1st	10	Hospital resident	1	0
		3rd	1	Student 1	2	2
		3rd	2	Student 2	0	0
		3rd	3	Student 3	1	1
		3rd	4	Student 4	0	0
		3rd	5	Student 5	0	0
		3rd	6	Teacher 1	0	0
		3rd	7	Teacher 2	0	0
		3rd	8	Teacher 3	0	0
		3rd	9	Teacher 4	1	1
		4th	1	Student 1	0	0
		4th	2	Student 2	2	0
		4th	3	Student 3	1	0
		4th	4	Student 4	1	0
		4th	5	Student 5	0	0
		4th	6	Teacher 1	0	0
		4th	7	Teacher 2	2	2
		4th	8	Teacher 3	1	1
		4th	9	Teacher 4	0	0
		5th	1	Student 1	1	0
		5th	2	Student 2	1	0
		5th	3	Student 3	1	0
		5th	4	Student 4	1	0
		5th	5	Student 5	1	0
		5th	6	Teacher 1	0	0
		5th	7	Teacher 2	1	0
		5th	8	Teacher 3	0	0
		5th	9	Teacher 4	1	0
3	141129	1st	1	Student 1	2	0
		1st	2	Student 2	1	0
		1st	3	Student 3	1	0
		1st	4	Student 4	1	0
		1st	6	Teacher 1	0	0
		1st	7	Teacher 2	0	0
		1st	8	Teacher 3	1	0
		1st	9	Teacher 4	0	0
		1st	10	Hospital resident	1	0
		3rd	1	Student 1	0	0
		3rd	2	Student 2	1	0
		3rd	3	Student 3	0	0
		3rd	4	Student 4	0	0
		3rd	6	Teacher 1	1	0
		3rd	7	Teacher 2	0	0
		3rd	8	Teacher 3	0	0
		3rd	9	Teacher 4	0	0
		4th	1	Student 1	0	0
		4th	2	Student 2	1	0
		4th	3	Student 3	0	0
		4th	4	Student 4	0	0
		4th	6	Teacher 1	1	0
		4th	7	Teacher 2	0	0
		4th	8	Teacher 3	0	0
		4th	9	Teacher 4	0	0
		5th	1	Student 1	1	0
		5th	2	Student 2	1	0
		5th	3	Student 3	1	0
		5th	4	Student 4	1	0
		5th	6	Teacher 1	1	0
		5th	7	Teacher 2	0	0
		5th	8	Teacher 3	0	0
		5th	9	Teacher 4	0	0
4	141208	1st	1	Student 1	2	2
		1st	2	Student 2	1	1
		1st	3	Student 3	1	0
		1st	4	Student 4	0	0
		1st	6	Teacher 1	1	0
		1st	7	Teacher 2	4	3
		1st	8	Teacher 3	2	1
		1st	9	Teacher 4	1	0
		1st	10	Hospital resident	2	0
		3rd	1	Student 1	0	0
		3rd	2	Student 2	0	0
		3rd	3	Student 3	1	1
		3rd	4	Student 4	1	1
		3rd	6	Teacher 1	0	0
		3rd	7	Teacher 2	2	2
		3rd	8	Teacher 3	0	0
		3rd	9	Teacher 4	1	1
5	150209	1st	1	Student 1	1	0
		1st	2	Student 2	1	0
		1st	3	Student 3	1	0
		1st	4	Student 4	1	0
		1st	6	Teacher 1	1	0
		1st	7	Teacher 2	1	0
		1st	8	Teacher 3	0	0
		1st	9	Teacher 4	0	0
		1st	10	Hospital resident	1	0
		4th	1	Student 1	2	2
		4th	2	Student 2	0	0
		4th	3	Student 3	0	0
		4th	4	Student 4	0	0
		4th	6	Teacher 1	0	0
		4th	7	Teacher 2	4	4
		4th	8	Teacher 3	0	0
		4th	9	Teacher 4	0	0
6	150216	1st	1	Student 1	2	0
		1st	2	Student 2	1	0
		1st	3	Student 3	1	0
		1st	4	Student 4	1	0
		1st	6	Teacher 1	1	0
		1st	7	Teacher 2	2	0
		1st	8	Teacher 3	0	0
		1st	9	Teacher 4	0	0
		1st	10	Hospital resident	1	0
		2nd	1	Student 1	2	1
		2nd	2	Student 2	0	0
		2nd	3	Student 3	0	0
		2nd	4	Student 4	0	0
		2nd	6	Teacher 1	0	0
		2nd	7	Teacher 2	0	0
		2nd	8	Teacher 3	0	0
		2nd	9	Teacher 4	1	1
		3rd	1	Student 1	0	0
		3rd	2	Student 2	1	0
		3rd	3	Student 3	1	0
		3rd	4	Student 4	0	0
		3rd	6	Teacher 1	2	0
		3rd	7	Teacher 2	0	0
		3rd	8	Teacher 3	0	0
		3rd	9	Teacher 4	0	0
7	150302	1st	1	Student 1	1	0
		1st	2	Student 2	1	0
		1st	3	Student 3	1	0
		1st	4	Student 4	1	0
		1st	6	Teacher 1	1	0
		1st	7	Teacher 2	0	0
		1st	8	Teacher 3	0	0
		1st	9	Teacher 4	1	0
		1st	10	Hospital resident	1	0
		3rd	1	Student 1	0	0
		3rd	2	Student 2	3	3
		3rd	3	Student 3	0	0
		3rd	4	Student 4	0	0
		3rd	6	Teacher 1	1	0
		3rd	7	Teacher 2	0	0
		3rd	8	Teacher 3	0	0
		3rd	9	Teacher 4	0	0
		5th	1	Student 1	2	2
		5th	2	Student 2	0	0
		5th	3	Student 3	0	0
		5th	4	Student 4	0	0
		5th	6	Teacher 1	0	0
		5th	7	Teacher 2	0	0
		5th	8	Teacher 3	0	0
		5th	9	Teacher 4	0	0
8	150310	1st	1	Student 1	2	0
		1st	2	Student 2	1	0
		1st	3	Student 3	0	0
		1st	4	Student 4	0	0
		1st	6	Teacher 1	2	0
		1st	7	Teacher 2	0	0
		1st	8	Teacher 3	0	0
		1st	9	Teacher 4	0	0
		1st	10	Hospital resident	4	0
		3rd	1	Student 1	2	2
		3rd	2	Student 2	0	0
		3rd	3	Student 3	0	0
		3rd	4	Student 4	0	0
		3rd	6	Teacher 1	1	1
		3rd	7	Teacher 2	0	0
		3rd	8	Teacher 3	0	0
		3rd	9	Teacher 4	0	0
9	150316	1st	1	Student 1	2	0
		1st	2	Student 2	1	0
		1st	3	Student 3	1	0
		1st	4	Student 4	1	0
		1st	6	Teacher 1	3	0
		1st	7	Teacher 2	0	0
		1st	8	Teacher 3	0	0
		1st	9	Teacher 4	0	0
		1st	10	Hospital resident	2	0
		2nd	1	Student 1	1	0
		2nd	2	Student 2	0	0
		2nd	3	Student 3	0	0
		2nd	4	Student 4	0	0
		2nd	6	Teacher 1	1	0
		2nd	7	Teacher 2	0	0
		2nd	8	Teacher 3	0	0
		2nd	9	Teacher 4	0	0
		3rd	1	Student 1	2	2
		3rd	2	Student 2	2	2
		3rd	3	Student 3	0	0
		3rd	4	Student 4	0	0
		3rd	6	Teacher 1	1	1
		3rd	7	Teacher 2	0	0
		3rd	8	Teacher 3	0	0
		3rd	9	Teacher 4	1	1
10	150320	1st	1	Student 1	0	0
		1st	2	Student 2	0	0
		1st	3	Student 3	0	0
		1st	4	Student 4	0	0
		1st	6	Teacher 1	1	0
		1st	7	Teacher 2	0	0
		1st	8	Teacher 3	0	0
		1st	9	Teacher 4	0	0
		1st	10	Hospital resident	1	0
		5th	1	Student 1	1	0
		5th	2	Student 2	1	0
		5th	3	Student 3	0	0
		5th	4	Student 4	0	0
		5th	6	Teacher 1	1	0
		5th	7	Teacher 2	0	0
		5th	8	Teacher 3	0	0
		5th	9	Teacher 4	0	0
11	150401	1st	1	Student 1	1	0
		1st	2	Student 2	1	0
		1st	3	Student 3	0	0
		1st	4	Student 4	0	0
		1st	6	Teacher 1	2	0
		1st	7	Teacher 2	0	0
		1st	8	Teacher 3	0	0
		1st	9	Teacher 4	0	0
		1st	10	Hospital resident	1	0
		2nd	1	Student 1	1	0
		2nd	2	Student 2	0	0
		2nd	3	Student 3	0	0
		2nd	4	Student 4	0	0
		2nd	6	Teacher 1	1	0
		2nd	7	Teacher 2	0	0
		2nd	8	Teacher 3	0	0
		2nd	9	Teacher 4	0	0
		3rd	1	Student 1	1	1
		3rd	2	Student 2	0	0
		3rd	3	Student 3	1	1
		3rd	4	Student 4	0	0
		3rd	6	Teacher 1	1	1
		3rd	7	Teacher 2	1	1
		3rd	8	Teacher 3	0	0
		3rd	9	Teacher 4	0	0
		4th	1	Student 1	3	2
		4th	2	Student 2	0	0
		4th	3	Student 3	0	0
		4th	4	Student 4	0	0
		4th	6	Teacher 1	2	1
		4th	7	Teacher 2	0	0
		4th	8	Teacher 3	0	0
		4th	9	Teacher 4	0	0
12	150406	1st	1	Student 1	1	0
		1st	2	Student 2	0	0
		1st	3	Student 3	0	0
		1st	4	Student 4	0	0
		1st	6	Teacher 1	1	0
		1st	7	Teacher 2	0	0
		1st	8	Teacher 3	0	0
		1st	9	Teacher 4	0	0
		1st	10	Hospital resident	1	0
		4th	1	Student 1	2	0
		4th	2	Student 2	1	0
		4th	3	Student 3	0	0
		4th	4	Student 4	0	0
		4th	6	Teacher 1	3	0
		4th	7	Teacher 2	0	0
		4th	8	Teacher 3	0	0
		4th	9	Teacher 4	0	0
13	150413	1st	1	Student 1	0	0
		1st	2	Student 2	0	0
		1st	3	Student 3	0	0
		1st	4	Student 4	0	0
		1st	6	Teacher 1	1	0
		1st	7	Teacher 2	0	0
		1st	8	Teacher 3	0	0
		1st	9	Teacher 4	0	0
		1st	10	Hospital resident	1	0
		2nd	1	Student 1	2	1
		2nd	2	Student 2	2	2
		2nd	3	Student 3	1	1
		2nd	4	Student 4	0	0
		2nd	6	Teacher 1	1	1
		2nd	7	Teacher 2	0	0
		2nd	8	Teacher 3	5	5
		2nd	9	Teacher 4	0	0
		3rd	1	Student 1	5	5
		3rd	2	Student 2	0	0
		3rd	3	Student 3	1	1
		3rd	4	Student 4	1	1
		3rd	6	Teacher 1	1	1
		3rd	7	Teacher 2	5	5
		3rd	8	Teacher 3	4	4
		3rd	9	Teacher 4	0	0
14	150427	1st	1	Student 1	6	5
		1st	2	Student 2	1	0
		1st	3	Student 3	0	0
		1st	4	Student 4	5	4
		1st	6	Teacher 1	5	0
		1st	7	Teacher 2	3	0
		1st	8	Teacher 3	0	0
		1st	9	Teacher 4	0	0
		1st	10	Hospital resident	1	0
		2nd	1	Student 1	0	0
		2nd	2	Student 2	3	3
		2nd	3	Student 3	0	0
		2nd	4	Student 4	2	2
		2nd	6	Teacher 1	0	0
		2nd	7	Teacher 2	4	0
		2nd	8	Teacher 3	0	0
		2nd	9	Teacher 4	0	0
		3rd	1	Student 1	0	0
		3rd	2	Student 2	0	0
		3rd	3	Student 3	2	2
		3rd	4	Student 4	3	3
		3rd	6	Teacher 1	0	0
		3rd	7	Teacher 2	4	0
		3rd	8	Teacher 3	0	0
		3rd	9	Teacher 4	0	0
		4th	1	Student 1	4	4
		4th	2	Student 2	0	0
		4th	3	Student 3	1	1
		4th	4	Student 4	3	3
		4th	6	Teacher 1	2	0
		4th	7	Teacher 2	1	0
		4th	8	Teacher 3	4	0
		4th	9	Teacher 4	0	0
		5th	1	Student 1	0	0
		5th	2	Student 2	0	0
		5th	3	Student 3	3	3
		5th	4	Student 4	2	2
		5th	6	Teacher 1	0	0
		5th	7	Teacher 2	2	0
		5th	8	Teacher 3	0	0
		5th	9	Teacher 4	1	0
15	150504	1st	1	Student 1	1	1
		1st	2	Student 2	2	2
		1st	3	Student 3	2	2
		1st	4	Student 4	5	5
		1st	6	Teacher 1	2	1
		1st	7	Teacher 2	0	0
		1st	8	Teacher 3	9	9
		1st	9	Teacher 4	1	1
		1st	10	Hospital resident	1	0
		2nd	1	Student 1	2	2
		2nd	2	Student 2	2	2
		2nd	3	Student 3	2	2
		2nd	4	Student 4	2	2
		2nd	6	Teacher 1	0	0
		2nd	7	Teacher 2	1	1
		2nd	8	Teacher 3	0	0
		2nd	9	Teacher 4	3	3
		3rd	1	Student 1	2	2
		3rd	2	Student 2	3	3
		3rd	3	Student 3	2	2
		3rd	4	Student 4	2	2
		3rd	6	Teacher 1	6	6
		3rd	7	Teacher 2	0	0
		3rd	8	Teacher 3	0	0
		3rd	9	Teacher 4	0	0
		4th	1	Student 1	2	2
		4th	2	Student 2	2	2
		4th	3	Student 3	2	2
		4th	4	Student 4	3	3
		4th	6	Teacher 1	1	1
		4th	7	Teacher 2	0	0
		4th	8	Teacher 3	0	0
		4th	9	Teacher 4	0	0
16	150511	1st	1	Student 1	1	0
		1st	2	Student 2	0	0
		1st	3	Student 3	0	0
		1st	4	Student 4	0	0
		1st	6	Teacher 1	0	0
		1st	7	Teacher 2	0	0
		1st	8	Teacher 3	0	0
		1st	9	Teacher 4	0	0
		1st	10	Teacher 5	0	0
		1st	11	Hospital resident	2	0
		3rd	1	Student 1	4	4
		3rd	2	Student 2	2	2
		3rd	3	Student 3	4	4
		3rd	4	Student 4	0	0
		3rd	6	Teacher 1	0	0
		3rd	7	Teacher 2	0	0
		3rd	8	Teacher 3	0	0
		3rd	9	Teacher 4	2	2
		3rd	10	Teacher 5	3	3
		4th	1	Student 1	1	1
		4th	2	Student 2	0	0
		4th	3	Student 3	0	0
		4th	4	Student 4	0	0
		4th	6	Teacher 1	1	1
		4th	7	Teacher 2	0	0
		4th	8	Teacher 3	0	0
		4th	9	Teacher 4	0	0
		4th	10	Teacher 5	0	0
		5th	1	Student 1	3	3
		5th	2	Student 2	2	2
		5th	3	Student 3	3	3
		5th	4	Student 4	0	0
		5th	6	Teacher 1	0	0
		5th	7	Teacher 2	3	3
		5th	8	Teacher 3	1	0
		5th	9	Teacher 4	3	2
		5th	10	Teacher 5	0	0
17	150518	1st	1	Student 1	3	3
		1st	2	Student 2	1	1
		1st	3	Student 3	2	2
		1st	4	Student 4	0	0
		1st	6	Teacher 1	3	1
		1st	7	Teacher 2	0	0
		1st	8	Teacher 3	3	3
		1st	9	Teacher 4	1	1
		1st	10	Teacher 5	0	0
		1st	11	Hospital resident	1	0
		3rd	1	Student 1	0	0
		3rd	2	Student 2	0	0
		3rd	3	Student 3	0	0
		3rd	4	Student 4	0	0
		3rd	6	Teacher 1	1	0
		3rd	7	Teacher 2	0	0
		3rd	8	Teacher 3	0	0
		3rd	9	Teacher 4	0	0
		3rd	10	Teacher 5	0	0
		4th	1	Student 1	2	2
		4th	2	Student 2	1	1
		4th	3	Student 3	1	1
		4th	4	Student 4	3	3
		4th	6	Teacher 1	3	3
		4th	7	Teacher 2	0	0
		4th	8	Teacher 3	1	1
		4th	9	Teacher 4	1	1
		4th	10	Teacher 5	0	0
		5th	1	Student 1	0	0
		5th	2	Student 2	1	1
		5th	3	Student 3	0	0
		5th	4	Student 4	0	0
		5th	6	Teacher 1	0	0
		5th	7	Teacher 2	0	0
		5th	8	Teacher 3	0	0
		5th	9	Teacher 4	0	0
		5th	10	Teacher 5	0	0
18	150525	1st	1	Student 1	0	0
		1st	2	Student 2	0	0
		1st	3	Student 3	0	0
		1st	4	Student 4	0	0
		1st	6	Teacher 1	1	0
		1st	7	Teacher 2	0	0
		1st	8	Teacher 3	0	0
		1st	9	Teacher 4	0	0
		1st	10	Teacher 5	0	0
		1st	11	Hospital resident	1	0
		2nd	1	Student 1	1	1
		2nd	2	Student 2	0	0
		2nd	3	Student 3	0	0
		2nd	4	Student 4	0	0
		2nd	6	Teacher 1	1	1
		2nd	7	Teacher 2	1	1
		2nd	8	Teacher 3	2	2
		2nd	9	Teacher 4	2	2
		2nd	10	Teacher 5	1	1
		4th	1	Student 1	3	3
		4th	2	Student 2	2	2
		4th	3	Student 3	2	2
		4th	4	Student 4	3	3
		4th	6	Teacher 1	0	0
		4th	7	Teacher 2	0	0
		4th	8	Teacher 3	0	0
		4th	9	Teacher 4	0	0
		4th	10	Teacher 5	0	0
		5th	1	Student 1	0	0
		5th	2	Student 2	0	0
		5th	3	Student 3	2	2
		5th	4	Student 4	1	1
		5th	6	Teacher 1	0	0
		5th	7	Teacher 2	2	2
		5th	8	Teacher 3	0	0
		5th	9	Teacher 4	3	3
		5th	10	Teacher 5	0	0
19	150601	1st	1	Student 1	3	2
		1st	2	Student 2	1	1
		1st	3	Student 3	1	1
		1st	4	Student 4	0	0
		1st	6	Teacher 1	3	3
		1st	7	Teacher 2	0	0
		1st	8	Teacher 3	2	2
		1st	9	Teacher 4	4	4
		1st	10	Teacher 5	0	0
		1st	11	Hospital resident	1	0
		2nd	1	Student 1	0	0
		2nd	2	Student 2	0	0
		2nd	3	Student 3	0	0
		2nd	4	Student 4	0	0
		2nd	6	Teacher 1	0	0
		2nd	7	Teacher 2	0	0
		2nd	8	Teacher 3	0	0
		2nd	9	Teacher 4	0	0
		2nd	10	Teacher 5	0	0
		4th	1	Student 1	0	0
		4th	2	Student 2	0	0
		4th	3	Student 3	0	0
		4th	4	Student 4	0	0
		4th	6	Teacher 1	0	0
		4th	7	Teacher 2	0	0
		4th	8	Teacher 3	0	0
		4th	9	Teacher 4	0	0
		4th	10	Teacher 5	0	0
		5th	1	Student 1	0	0
		5th	2	Student 2	0	0
		5th	3	Student 3	0	0
		5th	4	Student 4	0	0
		5th	6	Teacher 1	0	0
		5th	7	Teacher 2	0	0
		5th	8	Teacher 3	0	0
		5th	9	Teacher 4	0	0
		5th	10	Teacher 5	0	0
20	150608	1st	1	Student 1	3	2
		1st	2	Student 2	2	0
		1st	3	Student 3	1	0
		1st	4	Student 4	0	0
		1st	6	Teacher 1	4	1
		1st	7	Teacher 2	0	0
		1st	8	Teacher 3	0	0
		1st	9	Teacher 4	0	0
		1st	10	Teacher 5	0	0
		1st	11	Hospital resident	2	0
		2nd	1	Student 1	0	0
		2nd	2	Student 2	2	2
		2nd	3	Student 3	0	0
		2nd	4	Student 4	0	0
		2nd	6	Teacher 1	0	0
		2nd	7	Teacher 2	0	0
		2nd	8	Teacher 3	0	0
		2nd	9	Teacher 4	0	0
		2nd	10	Teacher 5	4	4
21	150615	1st	1	Student 1	1	1
		1st	2	Student 2	2	2
		1st	3	Student 3	1	1
		1st	4	Student 4	0	0
		1st	6	Teacher 1	3	1
		1st	7	Teacher 2	0	0
		1st	8	Teacher 3	1	1
		1st	9	Teacher 4	4	4
		1st	10	Teacher 5	0	0
		1st	11	Hospital resident	1	0
		2nd	1	Student 1	1	0
		2nd	2	Student 2	0	0
		2nd	3	Student 3	0	0
		2nd	4	Student 4	0	0
		2nd	6	Teacher 1	0	0
		2nd	7	Teacher 2	0	0
		2nd	8	Teacher 3	0	0
		2nd	9	Teacher 4	0	0
		2nd	10	Teacher 5	0	0
		5th	1	Student 1	1	1
		5th	2	Student 2	1	1
		5th	3	Student 3	0	0
		5th	4	Student 4	0	0
		5th	6	Teacher 1	0	0
		5th	7	Teacher 2	0	0
		5th	8	Teacher 3	0	0
		5th	9	Teacher 4	6	6
		5th	10	Teacher 5	0	0
22	150622	1st	1	Student 1	0	0
		1st	2	Student 2	0	0
		1st	3	Student 3	0	0
		1st	4	Student 4	0	0
		1st	6	Teacher 1	0	0
		1st	7	Teacher 2	0	0
		1st	8	Teacher 3	0	0
		1st	9	Teacher 4	0	0
		1st	10	Teacher 5	0	0
		1st	11	Hospital resident	1	0
		2nd	1	Student 1	3	2
		2nd	2	Student 2	5	5
		2nd	3	Student 3	2	2
		2nd	4	Student 4	4	4
		2nd	6	Teacher 1	9	7
		2nd	7	Teacher 2	0	0
		2nd	8	Teacher 3	12	12
		2nd	9	Teacher 4	1	1
		2nd	10	Teacher 5	0	0
		3rd	1	Student 1	0	0
		3rd	2	Student 2	3	3
		3rd	3	Student 3	0	0
		3rd	4	Student 4	2	2
		3rd	6	Teacher 1	1	1
		3rd	7	Teacher 2	0	0
		3rd	8	Teacher 3	3	3
		3rd	9	Teacher 4	0	0
		3rd	10	Teacher 5	0	0
		4th	1	Student 1	0	0
		4th	2	Student 2	0	0
		4th	3	Student 3	0	0
		4th	4	Student 4	0	0
		4th	6	Teacher 1	0	0
		4th	7	Teacher 2	0	0
		4th	8	Teacher 3	0	0
		4th	9	Teacher 4	2	2
		4th	10	Teacher 5	0	0
		5th	1	Student 1	0	0
		5th	2	Student 2	5	5
		5th	3	Student 3	0	0
		5th	4	Student 4	0	0
		5th	6	Teacher 1	0	0
		5th	7	Teacher 2	0	0
		5th	8	Teacher 3	0	0
		5th	9	Teacher 4	2	2
		5th	10	Teacher 5	0	0
23	150629	1st	1	Student 1	0	0
		1st	2	Student 2	0	0
		1st	3	Student 3	0	0
		1st	4	Student 4	0	0
		1st	6	Teacher 1	0	0
		1st	7	Teacher 2	0	0
		1st	8	Teacher 3	0	0
		1st	9	Teacher 4	0	0
		1st	10	Teacher 5	0	0
		1st	11	Hospital resident	2	0
		2nd	1	Student 1	2	2
		2nd	2	Student 2	2	2
		2nd	3	Student 3	2	2
		2nd	4	Student 4	0	0
		2nd	6	Teacher 1	0	0
		2nd	7	Teacher 2	0	0
		2nd	8	Teacher 3	8	0
		2nd	9	Teacher 4	1	1
		2nd	10	Teacher 5	0	0
		3rd	1	Student 1	2	2
		3rd	2	Student 2	0	0
		3rd	3	Student 3	0	0
		3rd	4	Student 4	0	0
		3rd	6	Teacher 1	0	0
		3rd	7	Teacher 2	0	0
		3rd	8	Teacher 3	0	0
		3rd	9	Teacher 4	0	0
		3rd	10	Teacher 5	3	3
24	150706	1st	1	Student 1	2	2
		1st	2	Student 2	2	2
		1st	3	Student 3	2	2
		1st	4	Student 4	2	2
		1st	6	Teacher 1	0	0
		1st	7	Teacher 2	0	0
		1st	8	Teacher 3	6	6
		1st	9	Teacher 4	2	2
		1st	10	Teacher 5	0	0
		1st	11	Hospital resident	1	0
		2nd	1	Student 1	1	1
		2nd	2	Student 2	2	1
		2nd	3	Student 3	1	1
		2nd	4	Student 4	1	1
		2nd	6	Teacher 1	1	0
		2nd	7	Teacher 2	0	0
		2nd	8	Teacher 3	0	0
		2nd	9	Teacher 4	0	0
		2nd	10	Teacher 5	0	0
		3rd	1	Student 1	3	3
		3rd	2	Student 2	4	3
		3rd	3	Student 3	2	2
		3rd	4	Student 4	3	3
		3rd	6	Teacher 1	1	0
		3rd	7	Teacher 2	0	0
		3rd	8	Teacher 3	3	3
		3rd	9	Teacher 4	2	2
		3rd	10	Teacher 5	0	0
		4th	1	Student 1	1	1
		4th	2	Student 2	1	1
		4th	3	Student 3	0	0
		4th	4	Student 4	2	2
		4th	6	Teacher 1	0	0
		4th	7	Teacher 2	0	0
		4th	8	Teacher 3	1	1
		4th	9	Teacher 4	1	1
		4th	10	Teacher 5	0	0
		5th	1	Student 1	1	1
		5th	2	Student 2	2	2
		5th	3	Student 3	1	1
		5th	4	Student 4	1	1
		5th	6	Teacher 1	0	0
		5th	7	Teacher 2	0	0
		5th	8	Teacher 3	4	4
		5th	9	Teacher 4	1	1
		5th	10	Teacher 5	0	0
25	150720	1st	1	Student 1	1	0
		1st	2	Student 2	0	0
		1st	3	Student 3	0	0
		1st	4	Student 4	0	0
		1st	6	Teacher 1	0	0
		1st	7	Teacher 2	0	0
		1st	8	Teacher 3	0	0
		1st	9	Teacher 4	0	0
		1st	10	Teacher 5	0	0
		1st	11	Hospital resident	1	0
		2nd	1	Student 1	3	3
		2nd	2	Student 2	3	3
		2nd	3	Student 3	1	1
		2nd	4	Student 4	3	3
		2nd	6	Teacher 1	0	0
		2nd	7	Teacher 2	0	0
		2nd	8	Teacher 3	5	5
		2nd	9	Teacher 4	0	0
		2nd	10	Teacher 5	0	0
		3rd	1	Student 1	5	5
		3rd	2	Student 2	1	1
		3rd	3	Student 3	0	0
		3rd	4	Student 4	3	3
		3rd	6	Teacher 1	7	7
		3rd	7	Teacher 2	0	0
		3rd	8	Teacher 3	0	0
		3rd	9	Teacher 4	0	0
		3rd	10	Teacher 5	0	0
		4th	1	Student 1	1	1
		4th	2	Student 2	1	1
		4th	3	Student 3	1	1
		4th	4	Student 4	1	1
		4th	6	Teacher 1	0	0
		4th	7	Teacher 2	0	0
		4th	8	Teacher 3	0	0
		4th	9	Teacher 4	0	0
		4th	10	Teacher 5	0	0
		5th	1	Student 1	1	1
		5th	2	Student 2	1	1
		5th	3	Student 3	0	0
		5th	4	Student 4	0	0
		5th	6	Teacher 1	0	0
		5th	7	Teacher 2	0	0
		5th	8	Teacher 3	1	1
		5th	9	Teacher 4	0	0
		5th	10	Teacher 5	0	0
26	150727	1st	1	Student 1	6	5
		1st	2	Student 2	3	2
		1st	3	Student 3	2	1
		1st	4	Student 4	3	2
		1st	6	Teacher 1	10	2
		1st	7	Teacher 2	2	2
		1st	8	Teacher 3	1	1
		1st	9	Teacher 4	3	3
		1st	10	Teacher 5	0	0
		1st	11	Hospital resident	1	0
		2nd	1	Student 1	2	2
		2nd	2	Student 2	2	2
		2nd	3	Student 3	4	4
		2nd	4	Student 4	4	4
		2nd	6	Teacher 1	0	0
		2nd	7	Teacher 2	3	3
		2nd	8	Teacher 3	7	7
		2nd	9	Teacher 4	3	3
		2nd	10	Teacher 5	0	0
		3rd	1	Student 1	3	3
		3rd	2	Student 2	2	2
		3rd	3	Student 3	3	3
		3rd	4	Student 4	3	3
		3rd	6	Teacher 1	0	0
		3rd	7	Teacher 2	2	2
		3rd	8	Teacher 3	1	1
		3rd	9	Teacher 4	2	2
		4th	10	Teacher 5	0	0
		4th	1	Student 1	5	5
		4th	2	Student 2	1	1
		4th	3	Student 3	4	4
		4th	4	Student 4	4	4
		4th	6	Teacher 1	0	0
		4th	7	Teacher 2	1	1
		4th	8	Teacher 3	3	3
		4th	9	Teacher 4	4	4
		4th	10	Teacher 5	0	0
		5th	1	Student 1	1	1
		5th	2	Student 2	1	1
		5th	3	Student 3	0	0
		5th	4	Student 4	0	0
		5th	6	Teacher 1	0	0
		5th	7	Teacher 2	1	1
		5th	8	Teacher 3	0	0
		5th	9	Teacher 4	0	0
		5th	10	Teacher 5	0	0
27	150907	1st	1	Student 1	1	0
		1st	2	Student 2	1	0
		1st	3	Student 3	0	0
		1st	4	Student 4	0	0
		1st	6	Teacher 1	1	0
		1st	7	Teacher 2	0	0
		1st	8	Teacher 3	0	0
		1st	9	Teacher 4	1	0
		1st	10	Teacher 5	0	0
		1st	11	Hospital resident	2	0
		4th	1	Student 1	2	2
		4th	2	Student 2	2	2
		4th	3	Student 3	2	2
		4th	4	Student 4	0	0
		4th	6	Teacher 1	3	3
		4th	7	Teacher 2	0	0
		4th	8	Teacher 3	0	0
		4th	9	Teacher 4	0	0
28	150911	1st	1	Student 1	1	0
		1st	2	Student 2	1	0
		1st	3	Student 3	1	0
		1st	4	Student 4	1	0
		1st	6	Teacher 1	1	0
		1st	7	Teacher 2	0	0
		1st	8	Teacher 3	0	0
		1st	9	Teacher 4	0	0
		1st	10	Teacher 5	0	0
		1st	11	Hospital resident	2	0
		3rd	1	Student 1	3	3
		3rd	2	Student 2	2	2
		3rd	3	Student 3	2	2
		3rd	4	Student 4	2	2
		3rd	6	Teacher 1	0	0
		3rd	7	Teacher 2	0	0
		3rd	8	Teacher 3	0	0
		3rd	9	Teacher 4	6	6
		4th	10	Teacher 5	0	0
		4th	1	Student 1	1	1
		4th	2	Student 2	0	0
		4th	3	Student 3	1	1
		4th	4	Student 4	0	0
		4th	6	Teacher 1	0	0
		4th	7	Teacher 2	0	0
		4th	8	Teacher 3	1	1
		4th	9	Teacher 4	1	1
		4th	10	Teacher 5	0	0
29	150925	1st	1	Student 1	1	0
		1st	2	Student 2	1	0
		1st	3	Student 3	1	0
		1st	4	Student 4	0	0
		1st	6	Teacher 1	0	0
		1st	7	Teacher 2	0	0
		1st	8	Teacher 3	0	0
		1st	9	Teacher 4	0	0
		1st	10	Teacher 5	0	0
		1st	11	Hospital resident	1	0
		2nd	1	Student 1	0	0
		2nd	2	Student 2	0	0
		2nd	3	Student 3	0	0
		2nd	4	Student 4	0	0
		2nd	6	Teacher 1	1	0
		2nd	7	Teacher 2	0	0
		2nd	8	Teacher 3	0	0
		2nd	9	Teacher 4	0	0
		2nd	10	Teacher 5	0	0
		3rd	1	Student 1	2	2
		3rd	2	Student 2	0	0
		3rd	3	Student 3	0	0
		3rd	4	Student 4	0	0
		3rd	6	Teacher 1	0	0
		3rd	7	Teacher 2	0	0
		3rd	8	Teacher 3	2	2
		3rd	9	Teacher 4	0	0
		5th	1	Student 1	0	0
		5th	2	Student 2	0	0
		5th	3	Student 3	0	0
		5th	4	Student 4	0	0
		5th	6	Teacher 1	1	0
		5th	7	Teacher 2	0	0
		5th	8	Teacher 3	0	0
		5th	9	Teacher 4	0	0
		5th	10	Teacher 5	0	0
30	151005	1st	1	Student 1	0	0
		1st	2	Student 2	0	0
		1st	3	Student 3	0	0
		1st	4	Student 4	0	0
		1st	6	Teacher 1	0	0
		1st	7	Teacher 2	0	0
		1st	8	Teacher 3	0	0
		1st	9	Teacher 4	0	0
		1st	10	Teacher 5	0	0
		1st	11	Hospital resident	1	0
		2nd	1	Student 1	3	3
		2nd	2	Student 2	3	3
		2nd	3	Student 3	0	0
		2nd	4	Student 4	0	0
		2nd	6	Teacher 1	0	0
		2nd	7	Teacher 2	0	0
		2nd	8	Teacher 3	2	2
		2nd	9	Teacher 4	1	1
		2nd	10	Teacher 5	0	0
31	151012	1st	1	Student 1	0	0
		1st	2	Student 2	1	1
		1st	3	Student 3	3	3
		1st	4	Student 4	0	0
		1st	6	Teacher 1	0	0
		1st	7	Teacher 2	0	0
		1st	8	Teacher 3	0	0
		1st	9	Teacher 4	2	2
		1st	10	Teacher 5	0	0
		1st	11	Hospital resident	0	0
		2nd	1	Student 1	1	1
		2nd	2	Student 2	1	1
		2nd	3	Student 3	0	0
		2nd	4	Student 4	0	0
		2nd	6	Teacher 1	0	0
		2nd	7	Teacher 2	0	0
		2nd	8	Teacher 3	1	1
		2nd	9	Teacher 4	0	0
		2nd	10	Teacher 5	0	0
		3rd	1	Student 1	1	1
		3rd	2	Student 2	0	0
		3rd	3	Student 3	0	0
		3rd	4	Student 4	0	0
		3rd	6	Teacher 1	0	0
		3rd	7	Teacher 2	0	0
		3rd	8	Teacher 3	1	1
		3rd	9	Teacher 4	0	0
32	151019	1st	1	Student 1	0	0
		1st	2	Student 2	0	0
		1st	3	Student 3	0	0
		1st	4	Student 4	0	0
		1st	6	Teacher 1	0	0
		1st	7	Teacher 2	0	0
		1st	8	Teacher 3	0	0
		1st	9	Teacher 4	0	0
		1st	10	Teacher 5	0	0
		1st	11	Hospital resident	1	0
		2nd	1	Student 1	2	2
		2nd	2	Student 2	2	2
		2nd	3	Student 3	2	2
		2nd	4	Student 4	2	2
		2nd	6	Teacher 1	4	3
		2nd	7	Teacher 2	0	0
		2nd	8	Teacher 3	2	2
		2nd	9	Teacher 4	1	1
		2nd	10	Teacher 5	0	0
		4th	1	Student 1	2	2
		4th	2	Student 2	0	0
		4th	3	Student 3	0	0
		4th	4	Student 4	0	0
		4th	6	Teacher 1	0	0
		4th	7	Teacher 2	0	0
		4th	8	Teacher 3	0	0
		4th	9	Teacher 4	1	1
		4th	10	Teacher 5	0	0
33	151026	1st	1	Student 1	1	0
		1st	2	Student 2	1	0
		1st	3	Student 3	1	0
		1st	4	Student 4	1	0
		1st	6	Teacher 1	1	0
		1st	7	Teacher 2	0	0
		1st	8	Teacher 3	0	0
		1st	9	Teacher 4	0	0
		1st	10	Teacher 5	0	0
		1st	11	Hospital resident	1	0
34	151102	1st	1	Student 1	0	0
		1st	2	Student 2	2	2
		1st	3	Student 3	0	0
		1st	4	Student 4	0	0
		1st	6	Teacher 1	1	0
		1st	7	Teacher 2	0	0
		1st	8	Teacher 3	0	0
		1st	9	Teacher 4	0	0
		1st	10	Teacher 5	1	1
		1st	11	Hospital resident	2	0
		4th	1	Student 1	1	0
		4th	2	Student 2	0	0
		4th	3	Student 3	0	0
		4th	4	Student 4	0	0
		4th	6	Teacher 1	1	0
		4th	7	Teacher 2	0	0
		4th	8	Teacher 3	0	0
		4th	9	Teacher 4	0	0
		4th	10	Teacher 5	0	0
35	151109	1st	1	Student 1	1	0
		1st	2	Student 2	1	0
		1st	3	Student 3	0	0
		1st	4	Student 4	0	0
		1st	6	Teacher 1	1	0
		1st	7	Teacher 2	0	0
		1st	8	Teacher 3	1	0
		1st	9	Teacher 4	0	0
		1st	10	Teacher 5	0	0
		1st	11	Hospital resident	1	0
		2nd	1	Student 1	1	0
		2nd	2	Student 2	0	0
		2nd	3	Student 3	0	0
		2nd	4	Student 4	0	0
		2nd	6	Teacher 1	1	0
		2nd	7	Teacher 2	0	0
		2nd	8	Teacher 3	0	0
		2nd	9	Teacher 4	0	0
		2nd	10	Teacher 5	0	0
		3rd	1	Student 1	2	2
		3rd	2	Student 2	2	2
		3rd	3	Student 3	0	0
		3rd	4	Student 4	0	0
		3rd	6	Teacher 1	0	0
		3rd	7	Teacher 2	0	0
		3rd	8	Teacher 3	0	0
		3rd	9	Teacher 4	0	0
		3rd	10	Teacher 5	0	0
		4th	1	Student 1	0	0
		4th	2	Student 2	1	1
		4th	3	Student 3	0	0
		4th	4	Student 4	0	0
		4th	6	Teacher 1	0	0
		4th	7	Teacher 2	0	0
		4th	8	Teacher 3	4	4
		4th	9	Teacher 4	0	0
		4th	10	Teacher 5	0	0
36	151116	1st	1	Student 1	2	0
		1st	2	Student 2	1	0
		1st	3	Student 3	1	1
		1st	4	Student 4	0	0
		1st	6	Teacher 1	2	1
		1st	7	Teacher 2	0	0
		1st	8	Teacher 3	2	2
		1st	9	Teacher 4	0	0
		1st	10	Teacher 5	0	0
		1st	11	Hospital resident	1	0
		3rd	1	Student 1	2	2
		3rd	2	Student 2	2	2
		3rd	3	Student 3	0	0
		3rd	4	Student 4	0	0
		3rd	6	Teacher 1	0	0
		3rd	7	Teacher 2	0	0
		3rd	8	Teacher 3	0	0
		3rd	9	Teacher 4	1	1
		4th	10	Teacher 5	2	2
		4th	1	Student 1	1	1
		4th	2	Student 2	0	0
		4th	3	Student 3	0	0
		4th	4	Student 4	0	0
		4th	6	Teacher 1	0	0
		4th	7	Teacher 2	0	0
		4th	8	Teacher 3	0	0
		4th	9	Teacher 4	0	0
		4th	10	Teacher 5	0	0
		5th	1	Student 1	1	0
		5th	2	Student 2	0	0
		5th	3	Student 3	0	0
		5th	4	Student 4	0	0
		5th	6	Teacher 1	2	0
		5th	7	Teacher 2	0	0
		5th	8	Teacher 3	0	0
		5th	9	Teacher 4	0	0
		5th	10	Teacher 5	0	0
37	151123	1st	1	Student 1	3	2
		1st	2	Student 2	3	2
		1st	3	Student 3	1	0
		1st	4	Student 4	1	0
		1st	6	Teacher 1	10	8
		1st	7	Teacher 2	0	0
		1st	8	Teacher 3	1	0
		1st	9	Teacher 4	0	0
		1st	10	Teacher 5	0	0
		1st	11	Hospital resident	3	0
38	151130	1st	1	Student 1	1	0
		1st	2	Student 2	1	0
		1st	3	Student 3	0	0
		1st	4	Student 4	0	0
		1st	6	Teacher 1	3	0
		1st	7	Teacher 2	0	0
		1st	8	Teacher 3	1	0
		1st	9	Teacher 4	0	0
		1st	10	Teacher 5	0	0
		1st	11	Hospital resident	1	0
		5th	1	Student 1	2	1
		5th	2	Student 2	1	1
		5th	3	Student 3	1	1
		5th	4	Student 4	0	0
		5th	6	Teacher 1	3	2
		5th	7	Teacher 2	0	0
		5th	8	Teacher 3	0	0
		5th	9	Teacher 4	0	0
		5th	10	Teacher 5	0	0
39	151205	1st	1	Student 1	1	0
		1st	2	Student 2	0	0
		1st	3	Student 3	0	0
		1st	4	Student 4	0	0
		1st	6	Teacher 1	0	0
		1st	7	Teacher 2	0	0
		1st	8	Teacher 3	1	0
		1st	9	Teacher 4	0	0
		1st	10	Teacher 5	0	0
		1st	11	Hospital resident	1	0
		3rd	1	Student 1	0	0
		3rd	2	Student 2	2	2
		3rd	3	Student 3	3	3
		3rd	4	Student 4	0	0
		3rd	6	Teacher 1	3	3
		3rd	7	Teacher 2	3	3
		3rd	8	Teacher 3	0	0
		3rd	9	Teacher 4	0	0

## Sheet: Dataset_2
Clinical education group	First day of clinical education period	Sex of students		Types of posted questions				Response time to student questions										The subject most frequently discussed in academic chats
	(YYMMDD)	Male	Female	Obstetrics	Endocrinology	Gynecology	Gynecologic oncology	0.5 h	1h	2h	3h	4h	5h	7h	12h	24h	After 24h	Medical case allocated to each student	Procedures and delivery observed during clinical education	Obstetrics and gynecology courses attended
1	141114	5	.	0	2	1	0	3										3	0	0
2	141122	4	1	1	1	2	0	.	1				1		1			4	0	0
3	141129	3	1	0	0	0	0	.	.				.		.			0	0	0
4	141208	3	1	1	1	0	1	1	1	1								0	0	3
5	150209	2	2	0	0	1	0	1										1	0	0
6	150216	3	1	0	0	1	0	1										0	1	0
7	150302	3	1	1	0	1	0		2									2	0	0
8	150310	1	3	0	0	0	1	1										1	0	0
9	150316	3	1	0	0	0	1	1										1	0	0
10	150320	2	1	0	0	0	0											0	0	0
11	150401	4	.	0	0	1	1	1							1			2	0	0
12	150406	3	1	0	0	0	0											0	0	0
13	150413	4	.	3	2	2	0	6			1							4	2	1
14	150427	1	2	3	7	4	3	12	4							1		11	6	0
15	150504	2	2	3	1	2	7	12		1	1	1						9	4	0
16	150511	2	1	3	0	2	4	7				2						5	0	4
17	150518	2	2	2	1	1	4	8										5	4	0
18	150525	2	2	1	1	0	3	2		2							1	3	1	1
19	150601	3	1	1	0	1	1	3		1								3	0	0
20	150608	2	2	0	0	1	1	1		1								2	0	0
21	150615	2	1	1	1	0	1	.	2	1								3	0	0
22	150622	2	2	4	1	1	3	8	1						1			5	4	0
23	150629	2	1	2	0	2	0	4										3	1	0
24	150706	2	2	6	4	4	3	11					1		1		1	9	4	4
25	150720	3	1	5	4	8	0	7	3			5					2	12	5	0
26	150727	3	1	5	6	6	4	6	5	2	5	1				2		12	9	0
27	150907	3	.	1	0	1	1	1		2								3	0	0
28	150911	3	1	1	2	1	3	4	1	1						1		0	7	0
29	150925	3	1	1	0	0	0	1										1	0	0
30	151005	2	2	3	0	2	2	2			2							7	0	0
31	151012	4	.	2	1	0	0					1			1	1		3	0	0
32	151019	3	1	1	0	2	2	3			1				1			5	0	0
33	151026	.	4	0	0	0	0	.	.	.	.	.	.		.	.	.	0	0	0
34	151102	4	.	0	0	1	0			1								1	0	0
35	151109	1	3	1	0	2	0								1			3	0	0
36	151116	3	.	1	0	0	2	1		1	2							2	1	0
37	151123	3	1	0	1	3	0		3									4	0	0
38	151130	1	2	0	0	2	1		2					1				2	0	1
39	151205	3	1	0	1	1	0			1			1					0	0	2
